# Supplementary material
Source: ML conference proceedings conference paper supplement (https://aclanthology.org/N18-1083)
Supplement: Software [file top5_bottom5_predictions.pdf › naacl_supplement/tables/top5_bottom5_predictions.pdf]

Table 6: Top 5 and bottom 5 accuracies in feature prediction using phonologically fine-tuned language embeddings.

| Task   | Feature | WALS Chapter       | Accuracy |
|--------|---------|--------------------|----------|
| G2P    | 90A     | Word Order         | 85.67    |
|        | 96A     | Word Order         | 85.17    |
|        | 95A     | Word Order         | 80.36    |
|        | 112A    | Simple Clauses     | 80.10    |
|        | 82A     | Word Order         | 80.08    |
|        | 75A     | Verbal Categories  | 34.34    |
|        | 16A     | Phonology          | 29.33    |
|        | 79A     | Verbal Categories  | 26.79    |
|        | 144A    | Word Order         | 22.99    |
|        | 50A     | Nominal Categories | 20.95    |
|        | 6A      | Phonology          | 89.45    |
|        | 18A     | Phonology          | 88.91    |
|        | 20A     | Morphology         | 82.74    |
|        | 19A     | Phonology          | 82.58    |
|        | 7A      | Phonology          | 80.97    |
| ASJP   | 144A    | Word Order         | 14.48    |
|        | 144L    | Word Order         | 10.07    |
|        | 62A     | Nominal Syntax     | 10.00    |
|        | 81B     | Word Order         | 9.52     |
|        | 133A    | Lexicon            | 8.18     |
| Morph. | 49A     | Nominal Categories | 83.33    |
|        | 31A     | Nominal Categories | 83.33    |
|        | 29A     | Morphology         | 83.33    |
|        | 32A     | Nominal Categories | 83.33    |
|        | 70A     | Verbal Categories  | 83.33    |
|        | 86A     | Word Order         | 35.00    |
|        | 38A     | Nominal Categories | 33.33    |
|        | 92A     | Word Order         | 30.00    |
|        | 67A     | Verbal Categories  | 27.78    |
|        | 46A     | Nominal Categories | 25.0     |
| PoS    | 37A     | Nominal Categories | 91.67    |
|        | 87A     | Word Order         | 88.89    |
|        | 54A     | Nominal Categories | 88.89    |
|        | 115A    | Simple Clauses     | 85.00    |
|        | 49A     | Nominal Categories | 83.33    |
|        | 3A      | Phonology          | 36.11    |
|        | 128A    | Complex Sentences  | 33.33    |
|        | 21B     | Morphology         | 27.78    |
|        | 30A     | Nominal Categories | 25.00    |
|        | 32A     | Nominal Categories | 25.0     |
