# Supplementary material
Source: ML conference proceedings conference paper supplement (https://aclanthology.org/N18-1083)

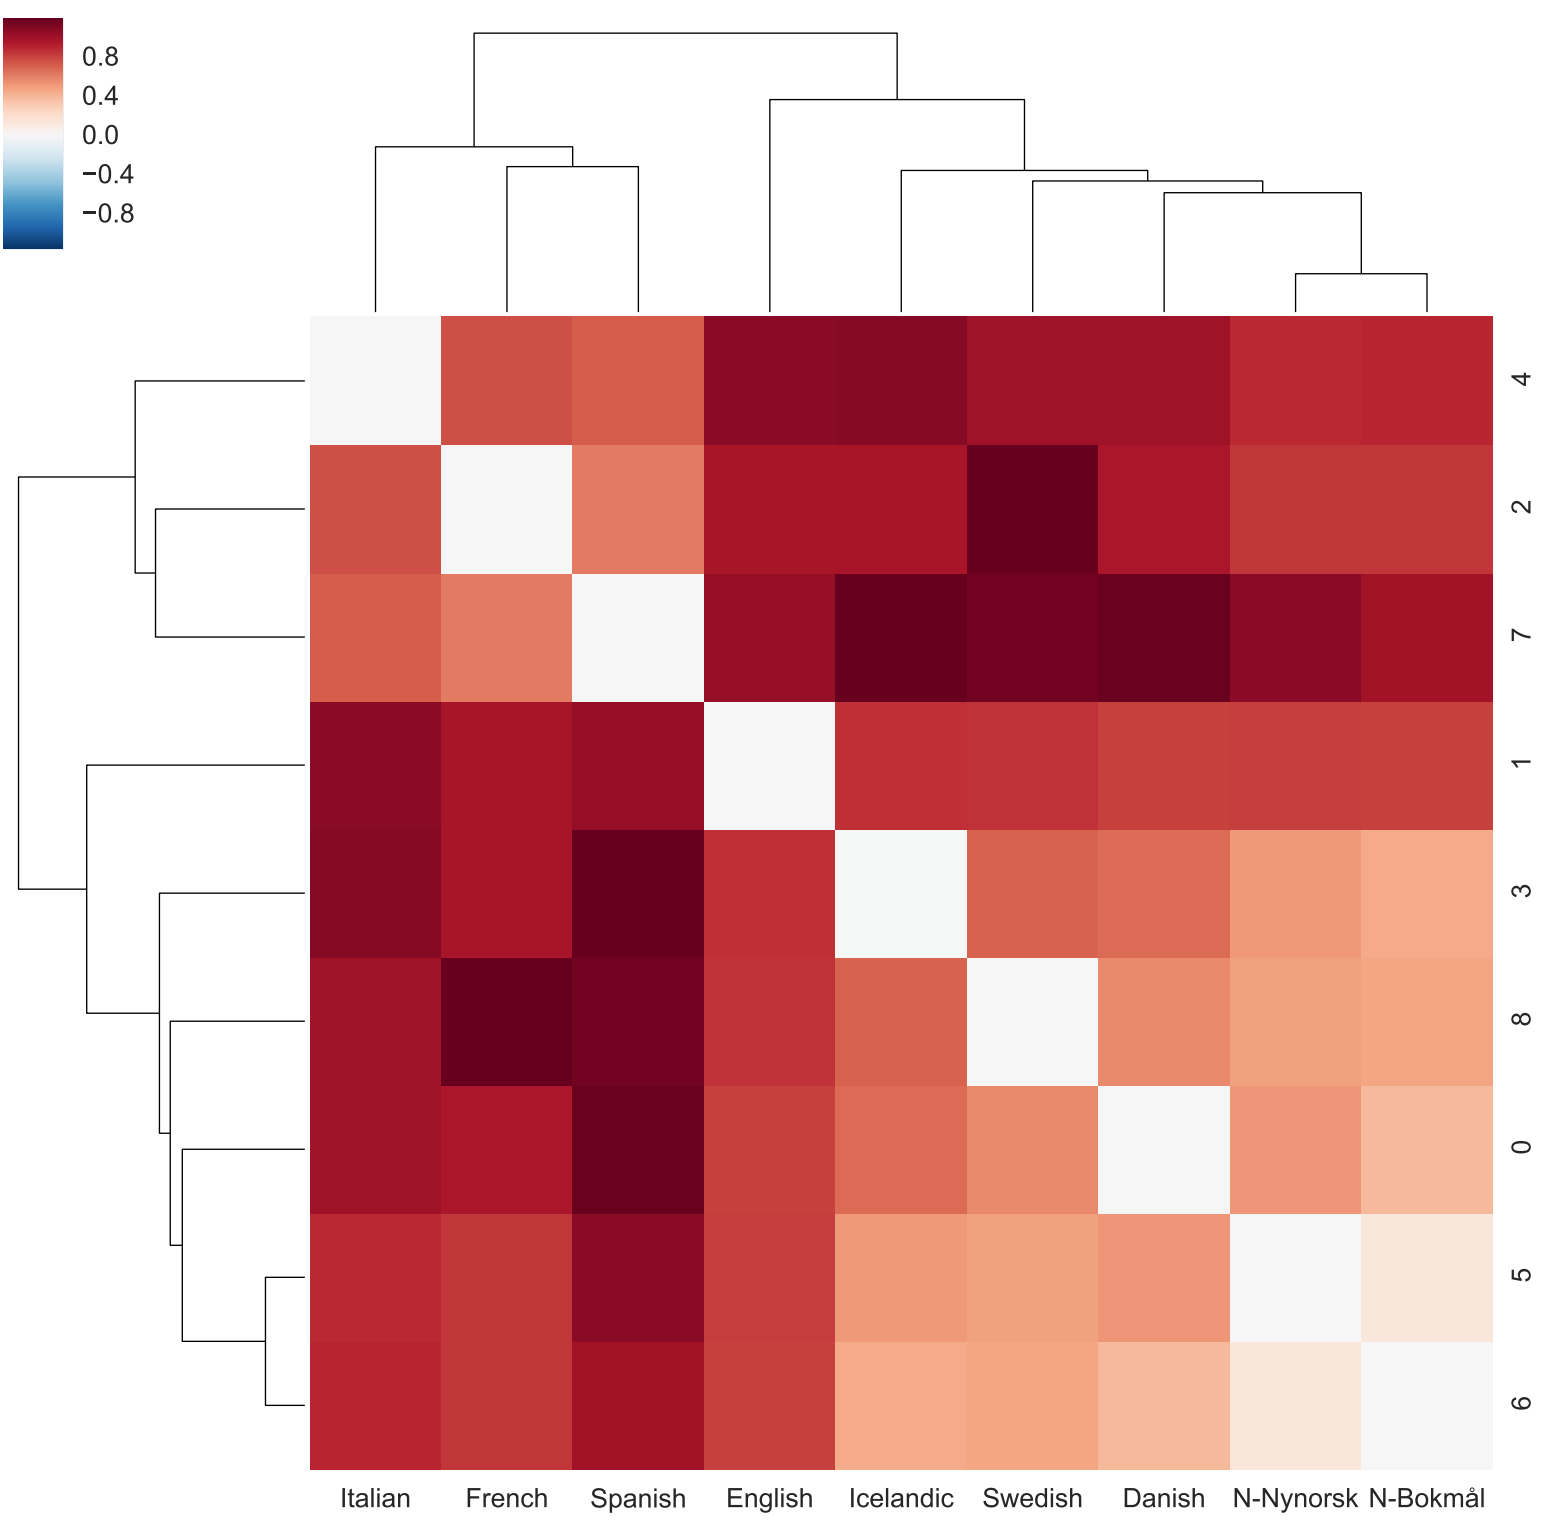

Supplement: Software [file hierarchy_pos.pdf › naacl_supplement/figures/hierarchy_pos.pdf]

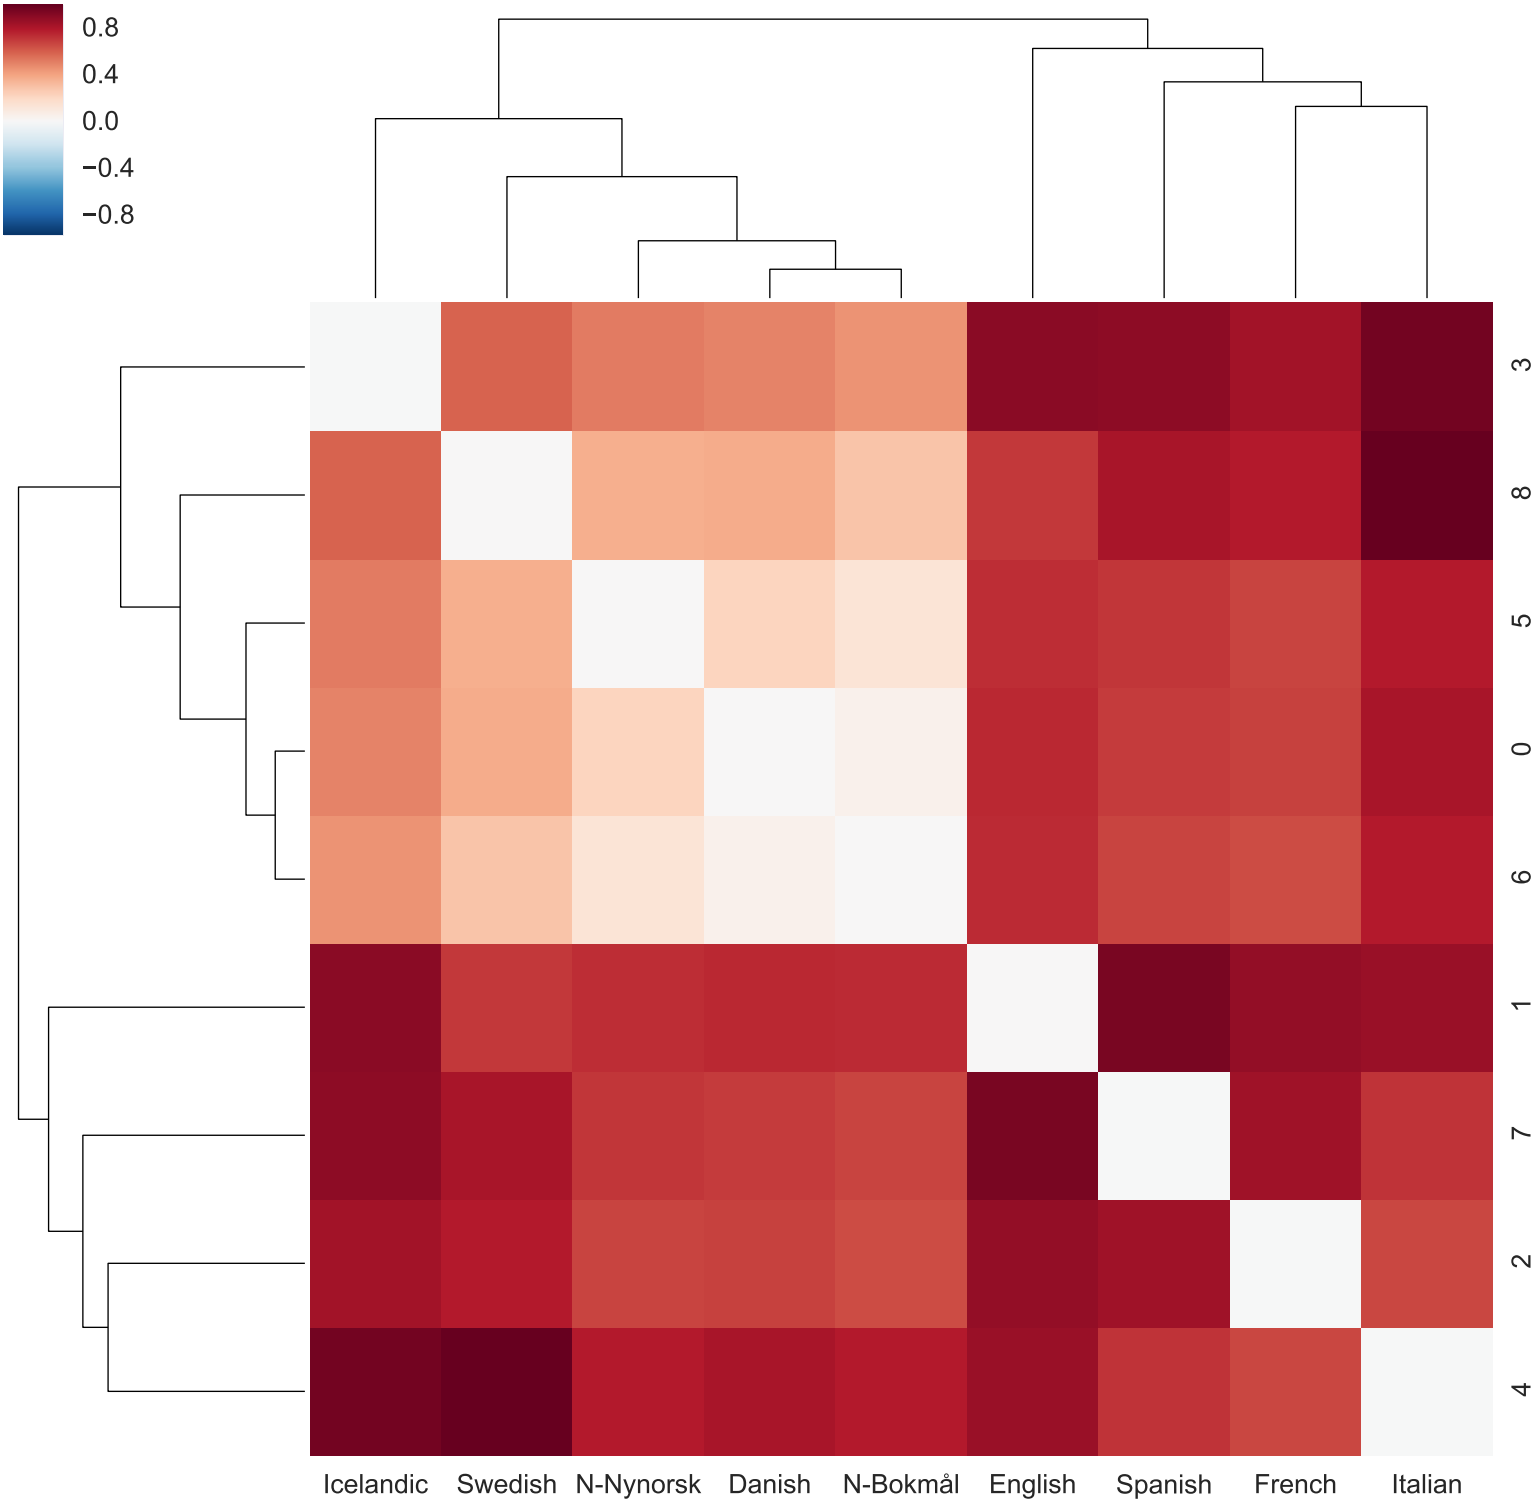

Supplement: Software [file hierarchy_pretrained.pdf › naacl_supplement/figures/hierarchy_pretrained.pdf]

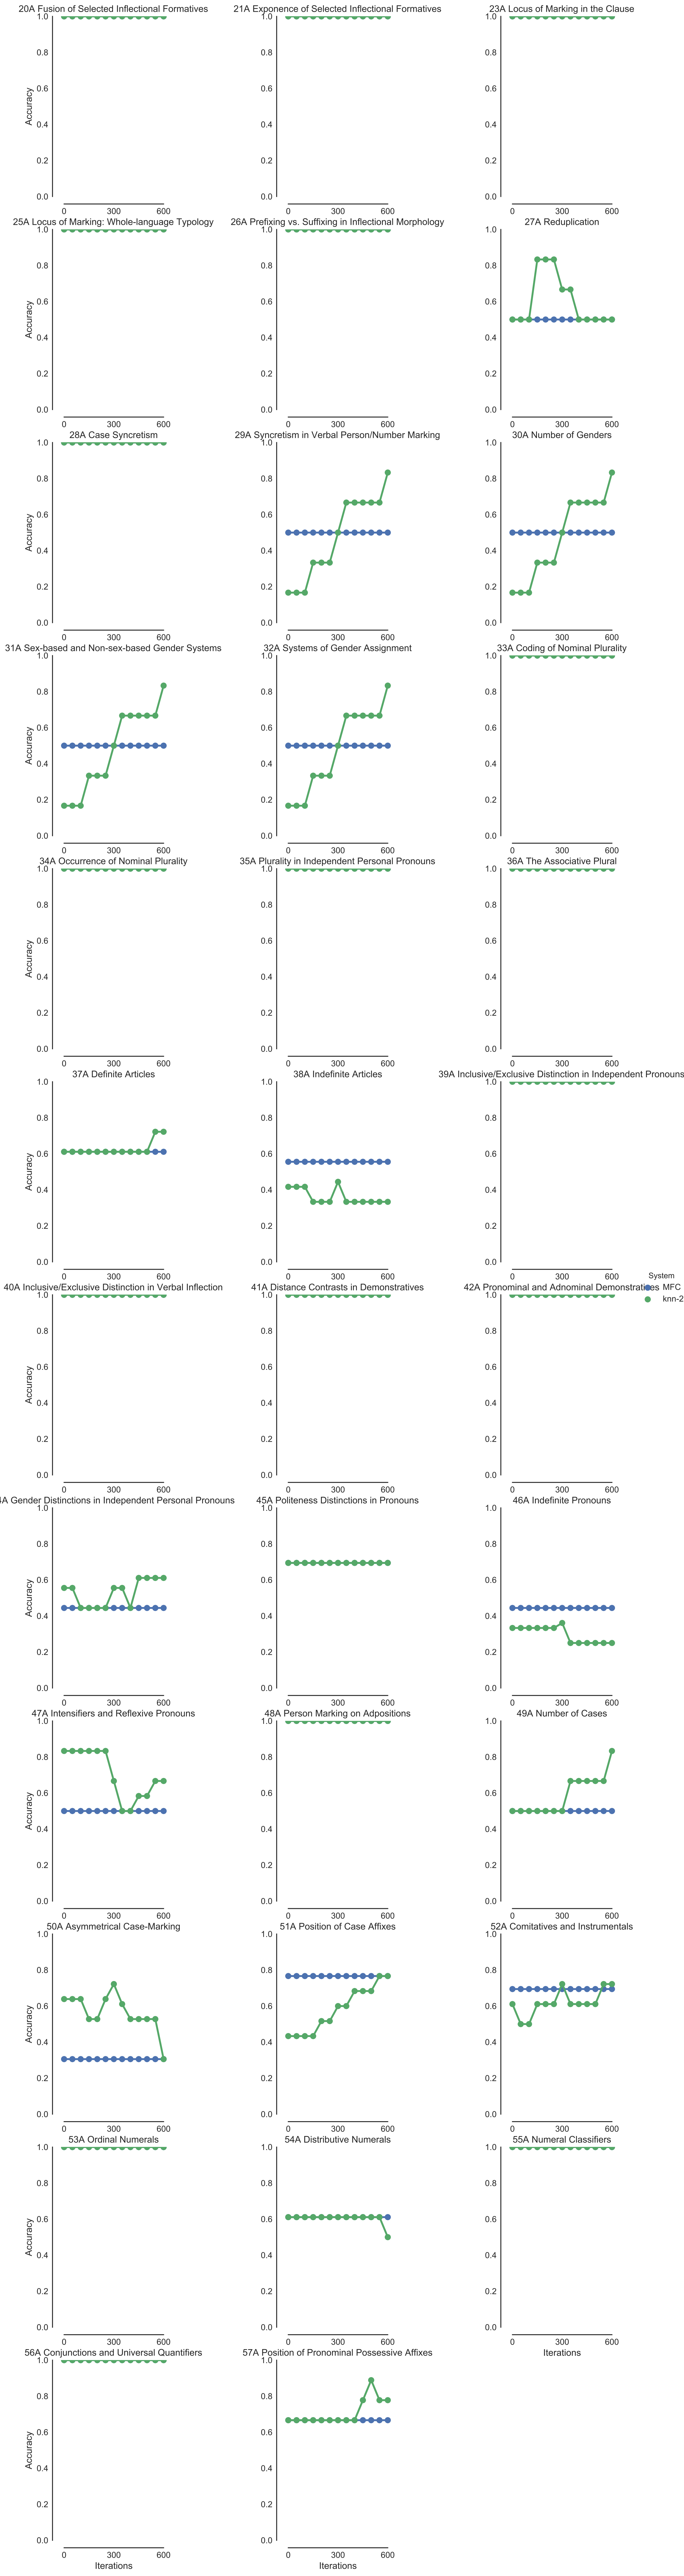

Supplement: Software [file wals_features_morph.pdf › naacl_supplement/tables/wals_features_morph.pdf]
